# Supplementary material
Source: HighWire-hosted journal article supplement (https://www.annfammed.org/highwire/filestream/13254/field_highwire_adjunct_files/0/ABFM_Supplemental_data.pdf)
Supplement: ABFM_Supplemental_data.pdf [file ABFM_Supplemental_data.pdf]

Shuemaker JC, Phillips RL, Newton WP. Clinical quality measures in a post-pandemic world: measuring what matters in family medicine. *Ann Fam Med*. 2020;18(4):380-382.

## References and figures

### References

1. Phillips RL Jr, Brundgardt S, Lesko SE, et al. The future role of the family physician in the United States: a rigorous exercise in definition. *Ann Fam Med*. 2014;12(3):250-255.
2. Marker JE, Davis KN, Etz R, et al. Report From the FMAHealth Practice Core Team: Achieving the Quadruple Aim Through Practice Transformation. *Fam Med*. 2019;51(2):193-197.
3. Etz RS, Zyzanski SJ, Gonzalez MM, Reves SR, O'Neal JP, Stange KC. A New Comprehensive Measure of High-Value Aspects of Primary Care. *Ann Fam Med*. 2019;17(3):221-230.
4. Etz RS, Gonzalez MM, Brooks EM, Stange KC. Less AND More Are Needed to Assess Primary Care. *J Am Board Fam Med*. 2017;30(1):13-15.
5. Phillips R. The PRIME Registry Helps Thousands of Primary Care Clinicians Liberate EHR Data and Prepare for MIPS. *J Am Board Fam Med*. 2017;30(4):559.
6. Hussey PS, Schneider EC, Rudin RS, Fox DS, Lai J, Pollack CE. Continuity and the costs of care for chronic disease. *JAMA Intern Med*. 2014;174(5):742-748.
7. Saultz JW, Lochner J. Interpersonal continuity of care and care outcomes: a critical review. *Ann Fam Med*. 2005;3(2):159-166.
8. De Maeseneer JM, De Prins L, Gosset C, Heyerick J. Provider continuity in family medicine: does it make a difference for total health care costs? *Ann Fam Med*. 2003;1(3):144-148.
9. Barker I, Steventon A, Deeny SR. Association between continuity of care in general practice and hospital admissions for ambulatory care sensitive conditions: cross sectional study of routinely collected, person level data. *BMJ*. 2017;356:j84.
10. Bazemore A, Petterson S, Peterson LE, Bruno R, Chung Y, Phillips RL Jr. Higher Primary Care Physician Continuity is Associated With Lower Costs and Hospitalizations. *Ann Fam Med*. 2018;16(6):492-497.
11. Bazemore A, Petterson S, Peterson LE, Phillips RL Jr. More Comprehensive Care Among Family Physicians is Associated with Lower Costs and Fewer Hospitalizations. *Ann Fam Med*. 2015;13(3):206-213..
12. O'Malley AS, Rich EC, Shang L, et al. New approaches to measuring the comprehensiveness of primary care physicians. *Health Serv Res*. 2019;54(2):356-366.
13. Schwartz AL, Jena AB, Zaslavsky AM, McWilliams JM. Analysis of Physician Variation in Provision of Low-Value Services. *JAMA Intern Med*. 2019;179(1):16-25.
14. Barreto TW, Chung Y, Wingrove P, et al. Primary Care Physician Characteristics Associated with Low Value Care Spending. *J Am Board Fam Med*. 2019;32(2):218-225.

15. News CMS and Media Group. (n.d.).CMS News and Media Group. (2020, March 22). CMS Newsroom. Retrieved from CMS.gov: <https://www.cms.gov/newsroom/press-releases/cms-announces-relief-clinicians-providers-hospitals-and-facilities-participating-quality-reporting>

16. Stange KC, Etz RS, Gullett H, et al. Metrics for assessing improvements in primary health care. *Annu Rev Public Health*. 2014;35:423-442.

17. Donaldson MS, Yordy KD, Lohr KN, Vanselow NA. *Primary Care: America's Health in a New Era*. Washington, DC: National Academies Press; 1996

18. ABIM Foundation. (2020, 05). *Choosing Wisely*. Retrieved from ABIM Foundation: <https://abimfoundation.org/what-we-do/choosing-wisely>.

**Figure 1. Measures That Matter Phases of Quality Measure Development chart describes the phases of development of the higher value primary care measures.**

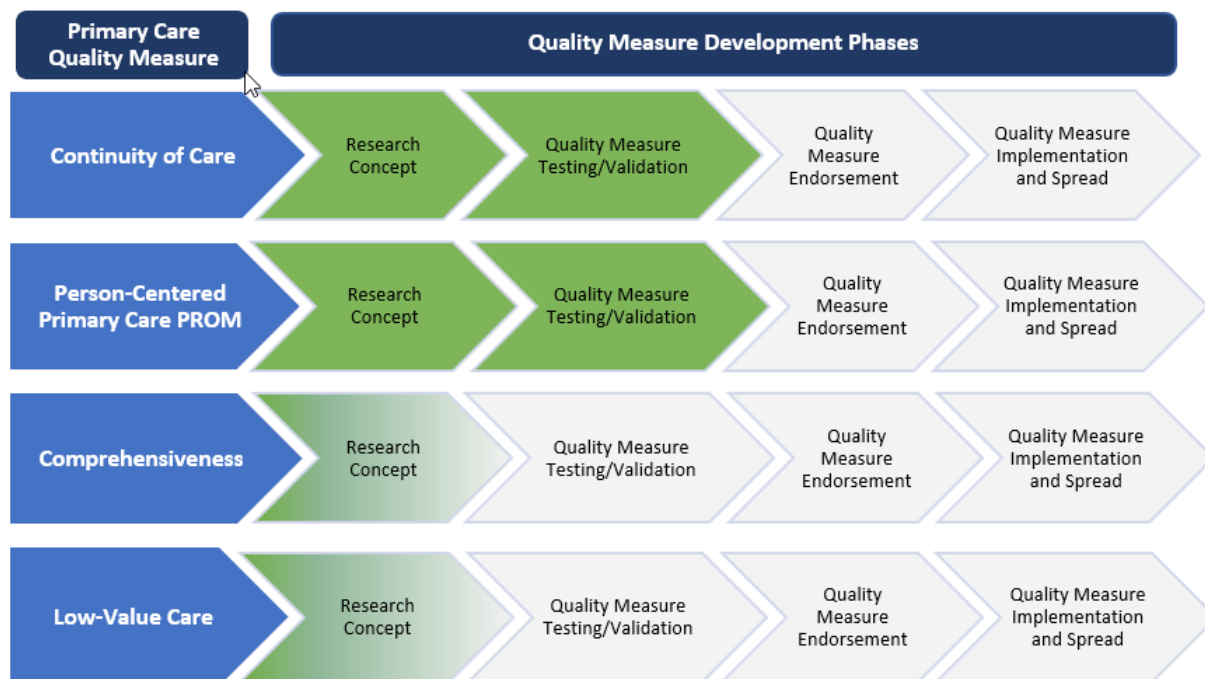

**Figure 2. Quality Measure Endorsement Programs and evaluation criteria.**

| Federal Endorsement and Use                                                                                                                                                                                                                                                                                                                                                                                        |                                                                                                                                                                                                                                                                                                                                                          |                                                                                                                                                                                                                                                                                                                                      |
|--------------------------------------------------------------------------------------------------------------------------------------------------------------------------------------------------------------------------------------------------------------------------------------------------------------------------------------------------------------------------------------------------------------------|----------------------------------------------------------------------------------------------------------------------------------------------------------------------------------------------------------------------------------------------------------------------------------------------------------------------------------------------------------|--------------------------------------------------------------------------------------------------------------------------------------------------------------------------------------------------------------------------------------------------------------------------------------------------------------------------------------|
| CMS QCDR Endorsement                                                                                                                                                                                                                                                                                                                                                                                               | NQF Endorsement                                                                                                                                                                                                                                                                                                                                          | CMS Quality Reporting or Payment Program Endorsement                                                                                                                                                                                                                                                                                 |
| <ul style="list-style-type: none"> <li>QCDR approval allows PRIME Registry Diplomates and PRIME Registry Eligible Providers to use the measure for MIPS Quality reporting.</li> <li>Evaluation criteria:                             <ul style="list-style-type: none"> <li>Importance</li> <li>Scientific Acceptability</li> <li>Feasibility</li> <li>Usability/Use</li> <li>Harmonization</li> </ul> </li> </ul> | <ul style="list-style-type: none"> <li>NQF endorsement process assesses whether a measure meets key requirements</li> <li>Evaluation criteria:                             <ul style="list-style-type: none"> <li>Importance</li> <li>Scientific Acceptability</li> <li>Feasibility</li> <li>Usability/Use</li> <li>Harmonization</li> </ul> </li> </ul> | <ul style="list-style-type: none"> <li>CMS implementation takes quality measures from development to active and used in a quality reporting or payment program.</li> <li>Can include a public rulemaking process – published in a proposed/final rule on the Federal Register.</li> <li>NQF endorsement is highly valued.</li> </ul> |

✓ *Continuity of Care*  
 ✓ *Person-Centered Primary Care Measure*
